# Supplementary material for: The survival rate of hepatocellular carcinoma in Asian countries: a systematic review and meta-analysis
Source: PubMed Central journal article supplement (PMC7003639; doi:10.17179/excli2019-1842), 2020-01-13

**Supplementary material to:**

**THE SURVIVAL RATE OF HEPATOCELLULAR CARCINOMA  
IN ASIAN COUNTRIES: A SYSTEMATIC REVIEW AND  
META-ANALYSIS**

Soheil Hassanipour<sup>1, 2</sup>, Mouhebat Vali<sup>3</sup>, Saber Gaffari-fam<sup>4</sup>, Hossein-Ali Nikbakht<sup>5</sup>,  
Elham Abdzadeh<sup>1</sup>, Farahnaz Joukar<sup>2, 6</sup>, Akram Pourshams<sup>2, 7</sup>, Afshin Shafaghi<sup>6</sup>,  
Mahdi Malakoutikhah<sup>8</sup>, Morteza Arab-Zozani<sup>9, 10</sup>, Hamid Salehiniya<sup>9</sup>,  
Fariborz Mansour-Ghanaei<sup>1, 2, 6\*</sup>

<sup>1</sup> GI Cancer Screening and Prevention Research Center, Guilan University of Medical Sciences, Rasht, Iran

<sup>2</sup> Gastrointestinal and Liver Diseases Research Center, Guilan University of Medical Sciences, Rasht, Iran

<sup>3</sup> Student Research Committee, Shiraz University of Medical Sciences, Shiraz, Iran

<sup>4</sup> Road Traffic Injury Research Center, Tabriz University of Medical Sciences, Tabriz, Iran

<sup>5</sup> Social Determinants of Health Research Center, Health Research Institute, Babol University of Medical Sciences, Babol, Iran

<sup>6</sup> Caspian Digestive Disease Research Center, Guilan University of Medical Sciences, Rasht, Iran

<sup>7</sup> Digestive Oncology Research Center, Digestive Diseases Research Institute, Tehran University of Medical Sciences, Tehran, Iran

<sup>8</sup> Department of Occupational Health, Kashan University of Medical Sciences, Kashan, Iran

<sup>9</sup> Social Determinants of Health Research Center, Birjand University of Medical Sciences, Birjand, Iran

<sup>10</sup> Iranian Center of Excellence in Health Management, School of Management and Medical Informatics, Tabriz University of Medical Sciences, Tabriz, Iran

\* **Corresponding author:** Fariborz Mansour-Ghanaei, Gastrointestinal and Liver Diseases Research Center, Guilan University of Medical Sciences, Razi Hospital, Sardar-Jangle Ave., P.O. Box: 41448-95655, Rasht, Iran. Tel: +98(13)33535116, Fax: +98(13)33534951, E-mail: [fmansourghanaei@gmail.com](mailto:fmansourghanaei@gmail.com)

<http://dx.doi.org/10.17179/excli2019-1842>

This is an Open Access article distributed under the terms of the Creative Commons Attribution License (<http://creativecommons.org/licenses/by/4.0/>).



**Supplementary Appendix 2: Result of Newcastle-Ottawa Quality Assessment Form**

| <b>Author (year)</b>    | <b>Selection</b> | <b>Comparability</b> | <b>Outcome</b> | <b>Total</b> | <b>Quality</b> |
|-------------------------|------------------|----------------------|----------------|--------------|----------------|
| Sriamporn (1995)        | 2                | 1                    | 2              | 5            | Fair           |
| Chen (1998)             | 2                | 1                    | 2              | 5            | Fair           |
| Esteban(1998)           | 3                | 1                    | 2              | 6            | Good           |
| Jin (1998)              | 3                | 1                    | 2              | 6            | Good           |
| Martin (1998)           | 2                | 1                    | 2              | 5            | Fair           |
| Lee (2000)              | 3                | 2                    | 2              | 7            | Good           |
| Chia (2001)             | 3                | 1                    | 2              | 6            | Good           |
| Sato (2002)             | 2                | 1                    | 2              | 5            | Fair           |
| Toyoda (2004)           | 2                | 1                    | 2              | 5            | Fair           |
| Tsukuma (2006)          | 3                | 1                    | 3              | 7            | Good           |
| Chen (2006)             | 2                | 1                    | 2              | 5            | Fair           |
| Yaghi (2006)            | 3                | 1                    | 3              | 7            | Good           |
| Chen (2007)             | 2                | 1                    | 2              | 5            | Fair           |
| Jung (2007)             | 2                | 1                    | 3              | 6            | Good           |
| Changchien (2008)       | 2                | 2                    | 2              | 6            | Good           |
| Lim (2009)              | 2                | 2                    | 2              | 6            | Good           |
| Redaniel (2009)         | 2                | 2                    | 2              | 6            | Good           |
| Tanaka (2009)           | 2                | 1                    | 3              | 6            | Good           |
| Laudico (2010)          | 2                | 1                    | 2              | 5            | Fair           |
| Law (2011)              | 4                | 1                    | 3              | 8            | Good           |
| Kudo (2011)             | 2                | 1                    | 2              | 5            | Fair           |
| Sumitsawan (2011)       | 3                | 1                    | 3              | 7            | Good           |
| Matsuda (2011)          | 2                | 1                    | 2              | 5            | Fair           |
| Redaniel (2011)         | 2                | 2                    | 2              | 6            | Good           |
| Chen (2011)             | 3                | 1                    | 3              | 7            | Good           |
| Chia (2011)             | 3                | 1                    | 3              | 7            | Good           |
| Jayalekshmi (2011)      | 2                | 1                    | 3              | 6            | Good           |
| Jayant (2011)           | 2                | 1                    | 3              | 6            | Good           |
| Martin (2011)           | 2                | 1                    | 2              | 5            | Fair           |
| Sankaranarayanan (2011) | 2                | 1                    | 2              | 5            | Fair           |
| Jung (2011)             | 2                | 1                    | 2              | 5            | Fair           |
| Sriplung (2011)         | 2                | 1                    | 2              | 5            | Fair           |
| Xiang (2011)            | 4                | 1                    | 3              | 8            | Good           |
| Xishan (2011)           | 4                | 1                    | 3              | 8            | Good           |
| Jung (2012)             | 2                | 1                    | 2              | 5            | Fair           |
| Azmawati (2012)         | 2                | 2                    | 2              | 6            | Good           |
| Chen (2013)             | 2                | 1                    | 3              | 6            | Good           |
| Jung (2013)             | 2                | 1                    | 2              | 5            | Fair           |
| Ito (2013)              | 2                | 1                    | 2              | 5            | Fair           |
| Norsa'adah (2013)       | 2                | 1                    | 2              | 5            | Fair           |
| Pinheiro (2014)         | 2                | 2                    | 2              | 6            | Good           |
| Ito (2014)              | 2                | 1                    | 2              | 5            | Fair           |
| Jung (2014)             | 2                | 1                    | 2              | 5            | Fair           |
| Fan (2014)              | 3                | 2                    | 3              | 8            | Good           |
| Somboon (2014)          | 2                | 2                    | 2              | 6            | Good           |
| Jung (2015)             | 2                | 1                    | 2              | 5            | Fair           |
| Maringe (2015)          | 2                | 2                    | 2              | 6            | Good           |
| Zeng (2015)             | 3                | 2                    | 2              | 7            | Good           |
| Liu (2015)              | 2                | 2                    | 2              | 6            | Good           |
| Xiao (2015)             | 2                | 2                    | 3              | 7            | Good           |
| Zhang (2015)            | 2                | 1                    | 2              | 5            | Fair           |
| Zheng (2015)            | 2                | 1                    | 2              | 5            | Fair           |
| Zhu (2015)              | 2                | 1                    | 2              | 5            | Fair           |
| Chiang (2016)           | 2                | 1                    | 2              | 5            | Fair           |

| Author (year)         | Selection | Comparability | Outcome | Total | Quality |
|-----------------------|-----------|---------------|---------|-------|---------|
| Kudo (2016)           | 2         | 1             | 2       | 5     | Fair    |
| Oh (2016)             | 2         | 1             | 2       | 5     | Fair    |
| Nakagawa-Senda (2017) | 2         | 1             | 2       | 5     | Fair    |
| Jung (2017)           | 2         | 1             | 2       | 5     | Fair    |
| Li (2017)             | 2         | 1             | 2       | 5     | Fair    |
| Chen (2018)           | 2         | 1             | 2       | 5     | Fair    |
| Chien (2018)          | 1         | 1             | 3       | 5     | Fair    |
| Jung (2018)           | 2         | 1             | 2       | 5     | Fair    |
| Li-Hsin (2018)        | 2         | 2             | 2       | 6     | Good    |

**Supplementary Appendix 3:** Result of meta-regression for one (A), three (B) and five-year (C) survival rate of liver cancer based on year of study

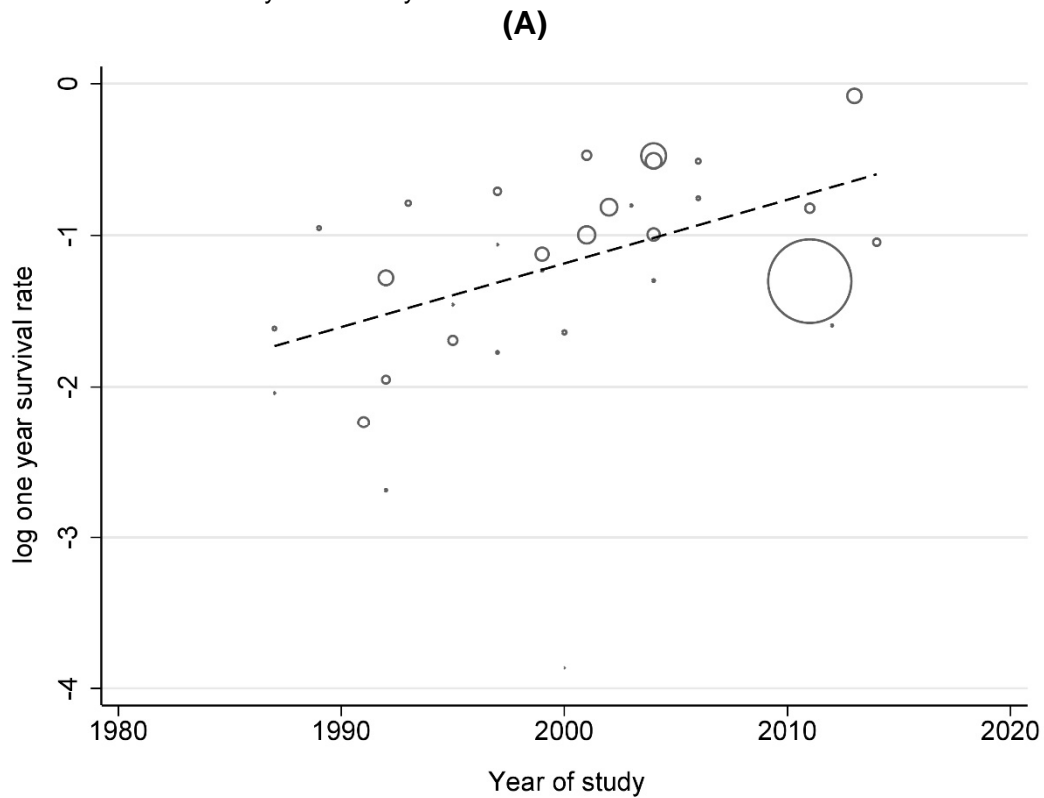

**(B)**

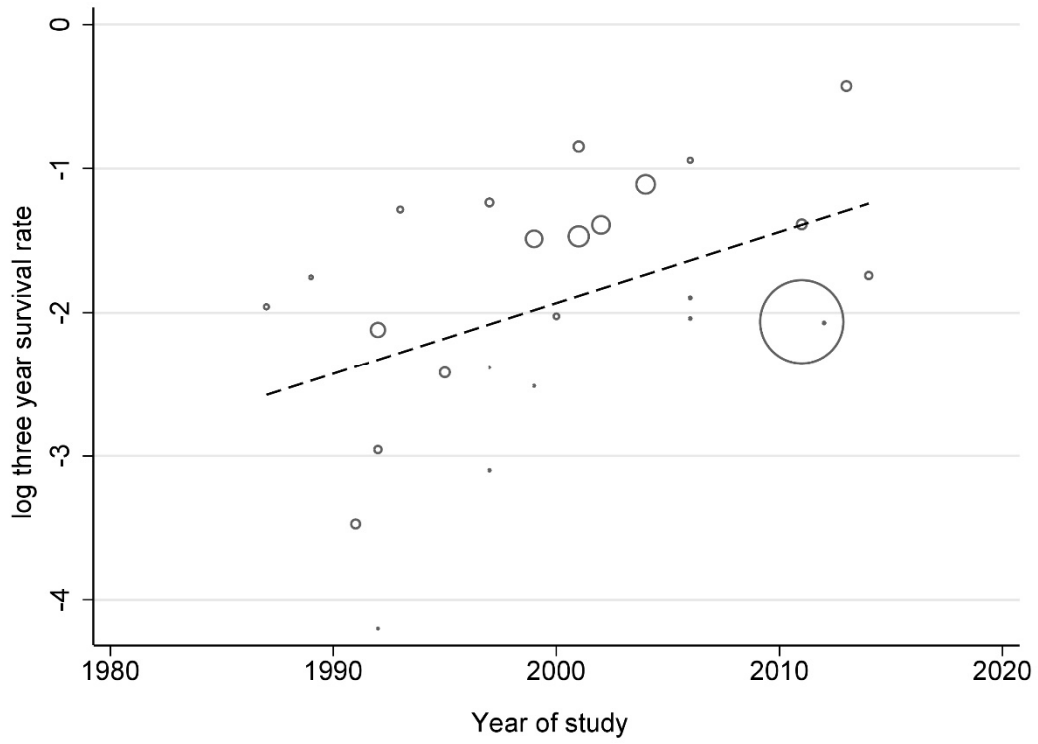

**(C)**

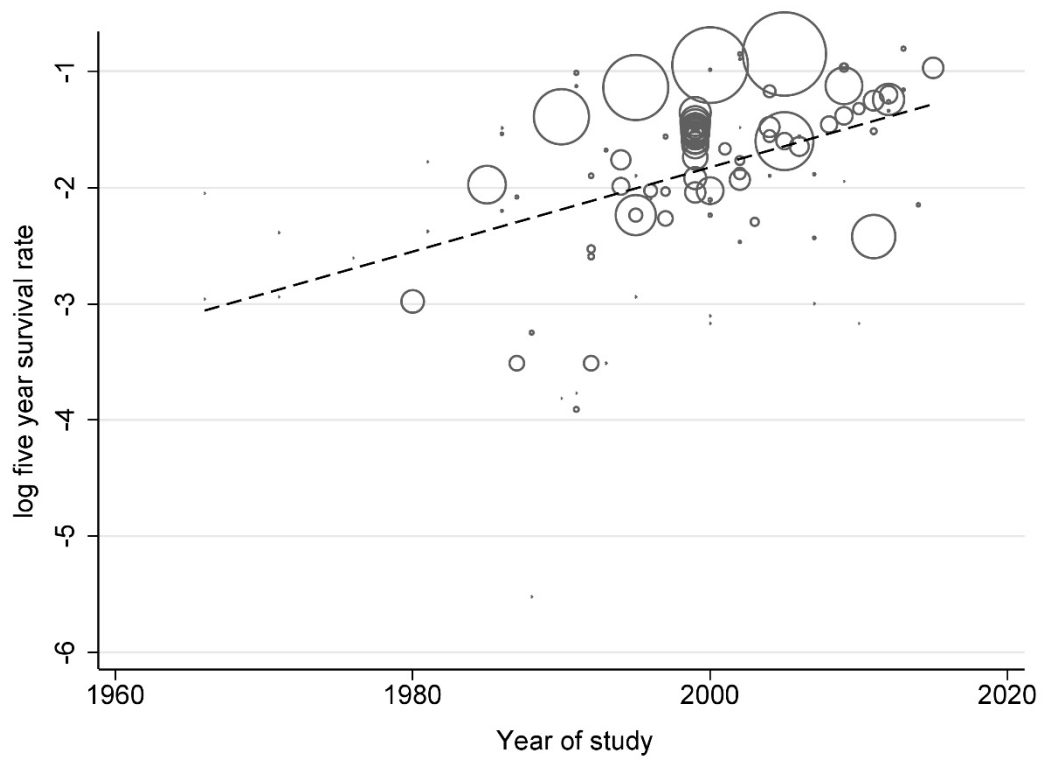

Supplement: EXCLI-19-108-s-001.pdf [file EXCLI-19-108-s-001.pdf]
